# Supplementary material for: Facile construction of novel imidazolidine-spirooxindoles via diastereoselective cycloaddition of N-acylhydrazine-derived imines with 3-isothiocyanato oxindoles
Source: Royal Society of Chemistry journal article supplement (doi:10.1039/c6ra01962e), 2016-01-01

## Supporting information

### Facile construction of novel imidazolidine-spirooxindoles via diastereoselective cycloaddition of *N*-acylhydrazine-derived imines with 3-isothiocyanato oxindoles

Hong-Wu Zhao,\* Bo Li, Xiu-Qing Song, Ting Tian, Hai-Liang Pang, Xiao-Qin Chen, Zhao Yang, Wei Meng.

<sup>a</sup> College of Life Science and Bio-engineering, Beijing University of Technology, Beijing 100124, P. R. China; *Phone*: 86-10-6739-6211; *Fax*: 86-10-6739-6211; *Email*: hwzhao@bjut.edu.cn

## Table of Contents

|                                                                                                                                       |   |
|---------------------------------------------------------------------------------------------------------------------------------------|---|
| General information .....                                                                                                             | 2 |
| Typical procedure for organocatalytic synthesis of imidazolidine-spirooxindole <b>3aa</b> .....                                       | 3 |
| X-Ray crystal data of compound <b>3aa</b> .....                                                                                       | 4 |
| Copies of <sup>1</sup> H NMR, <sup>13</sup> C NMR and <sup>19</sup> F NMR spectra for imidazolidine-spirooxindoles ( <b>3</b> ) ..... | 6 |

## General information

Unless noted otherwise, all reagents were commercially available and used without further purification. All solvents were distilled from the appropriate drying agents immediately before use. All air and moisture sensitive reactions were carried out under an inert atmosphere of dry nitrogen. Reactions were monitored by TLC carried out on 0.25 mm SDS silica gel coated glass plates (60F254) and compounds were detected with UV light and/or with iodide. Specific optical rotations were measured with a polarimeter. NMR spectra were recorded on 400 MHz instrument and calibrated using tetramethylsilane (TMS) as internal reference. High resolution mass spectra (HRMS) were recorded under electrospray ionization (ESI) conditions. Enantiomeric excess was determined by HPLC analyses using Chiralpak AD (25 cm  $\times$  0.46 cm) column.( solvent: hexane/ethanol = 70/30).

## Typical procedure for organocatalytic synthesis of imidazolidine-spirooxindole **3aa**

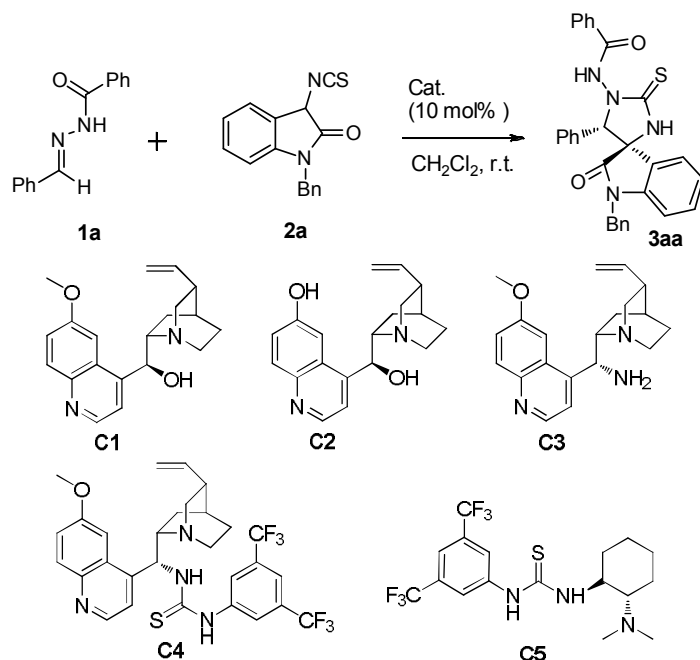

Catalyst (0.01 mmol) was added to a mixture of *N*-acylhaziridine-based imines **1a** (0.1 mmol) and 3-isothiocyanato oxindole **2a** (0.1 mmol) in anhydrous CH<sub>2</sub>Cl<sub>2</sub> (1.0 mL). The reaction mixture was stirred at room temperature for 2 h. After completion of the reaction, the crude product was purified by flash column chromatography on silica gel (petroleum ether / ethyl acetate = 4:1) to afford the pure product **3aa** as white powder (64-74% yield; >99:1 dr).

| Entry | Catalyst  | Time (min) | Yield (%) <sup>b</sup> | ee (%) <sup>c</sup> | dr <sup>d</sup> |
|-------|-----------|------------|------------------------|---------------------|-----------------|
| 1     | <b>C1</b> | 120        | 68                     | 0                   | >99:1           |
| 2     | <b>C2</b> | 120        | 64                     | 0                   | >99:1           |
| 3     | <b>C3</b> | 120        | 69                     | 0                   | >99:1           |
| 4     | <b>C4</b> | 120        | 74                     | 0                   | >99:1           |
| 5     | <b>C5</b> | 120        | 70                     | 0                   | >99:1           |

<sup>a</sup> Reactions were carried out with 0.1 mmol of **1a**, and 0.1 mmol of **2a** in the presence of 10 mol% of catalyst in 1.0 mL of CH<sub>2</sub>Cl<sub>2</sub> examined at room temperature. <sup>b</sup> Isolated yield. <sup>c</sup> Determined by chiral HPLC analysis. <sup>d</sup> Determined by <sup>1</sup>H NMR spectroscopy.

## X-Ray crystal data of compound 3aa

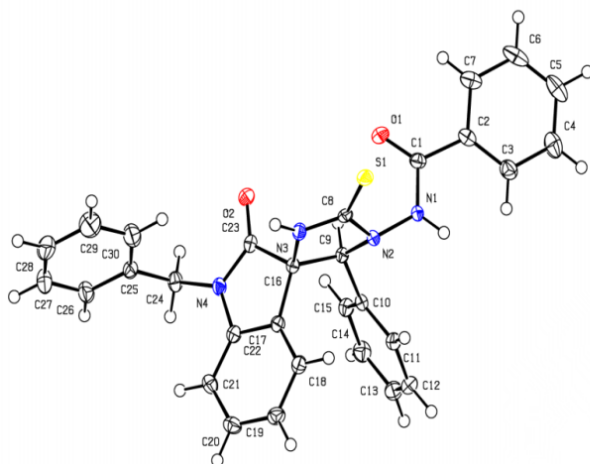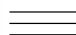

**3aa**

|                                 |                                                                                                                                            |
|---------------------------------|--------------------------------------------------------------------------------------------------------------------------------------------|
| Identification code             | <b>3aa</b>                                                                                                                                 |
| Empirical formula               | C <sub>30</sub> H <sub>24</sub> N <sub>4</sub> O <sub>2</sub> S                                                                            |
| Formula weight                  | 504.16                                                                                                                                     |
| Temperature                     | 113(2) K                                                                                                                                   |
| Wavelength                      | 0.71073 Å                                                                                                                                  |
| Crystal system, space group     | Triclinic, P-1                                                                                                                             |
| Unit cell dimensions            | a = 9.9840(13) Å    alpha = 117.420(7) deg.<br>b = 12.9333(14) Å    beta = 99.869(13) deg.<br>c = 13.6529(18) Å    gamma = 96.128(10) deg. |
| Volume                          | 1506.6(3) Å <sup>3</sup>                                                                                                                   |
| Z, Calculated density           | 2, 1.307 Mg/m <sup>3</sup>                                                                                                                 |
| Absorption coefficient          | 0.153 mm <sup>-1</sup>                                                                                                                     |
| F(000)                          | 624                                                                                                                                        |
| Crystal size                    | 0.20 x 0.18 x 0.12 mm                                                                                                                      |
| Theta range for data collection | 3.03 to 27.55 deg.                                                                                                                         |
| Limiting indices                | -12 ≤ h ≤ 12, -15 ≤ k ≤ 16, -17 ≤ l ≤ 17                                                                                                   |

|                                   |                                             |
|-----------------------------------|---------------------------------------------|
| Reflections collected / unique    | 15520 / 6658 [R(int) = 0.0164]              |
| Completeness to theta = 27.55     | 96.00%                                      |
| Absorption correction             | Semi-empirical from equivalents             |
| Max. and min. transmission        | 0.9819 and 0.9701                           |
| Refinement method                 | Full-matrix least-squares on F <sup>2</sup> |
| Data / restraints / parameters    | 6658 / 2 / 396                              |
| Goodness-of-fit on F <sup>2</sup> | 1.033                                       |
| Final R indices [I>2sigma(I)]     | R1 = 0.0326, wR2 = 0.0828                   |
| R indices (all data)              | R1 = 0.0386, wR2 = 0.0864                   |
| Largest diff. peak and hole       | 0.325 and -0.213 e.A <sup>-3</sup>          |

# Copies of $^1\text{H}$ NMR, $^{13}\text{C}$ NMR and $^{19}\text{F}$ NMR spectra for imidazolidine-spirooxindoles (3)

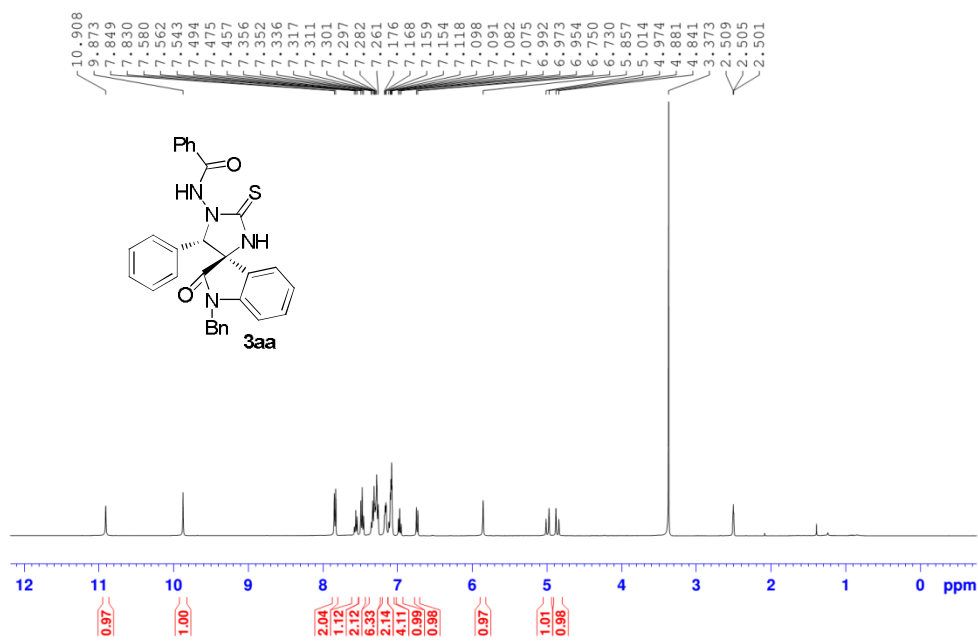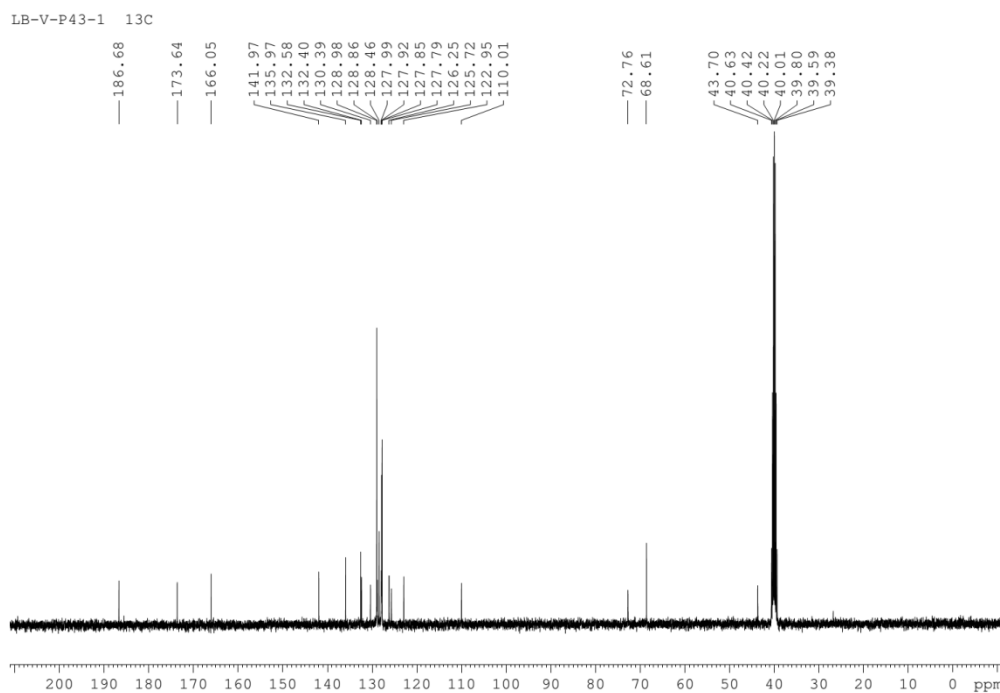

LB-V-P49-2

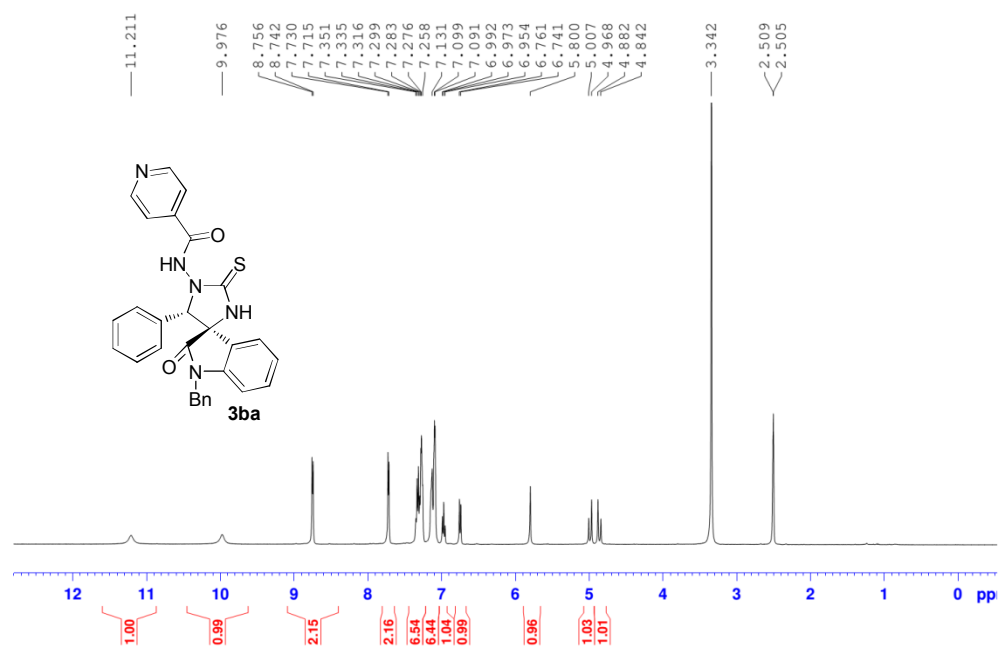

LB-V-P49-2 <sup>13</sup>C

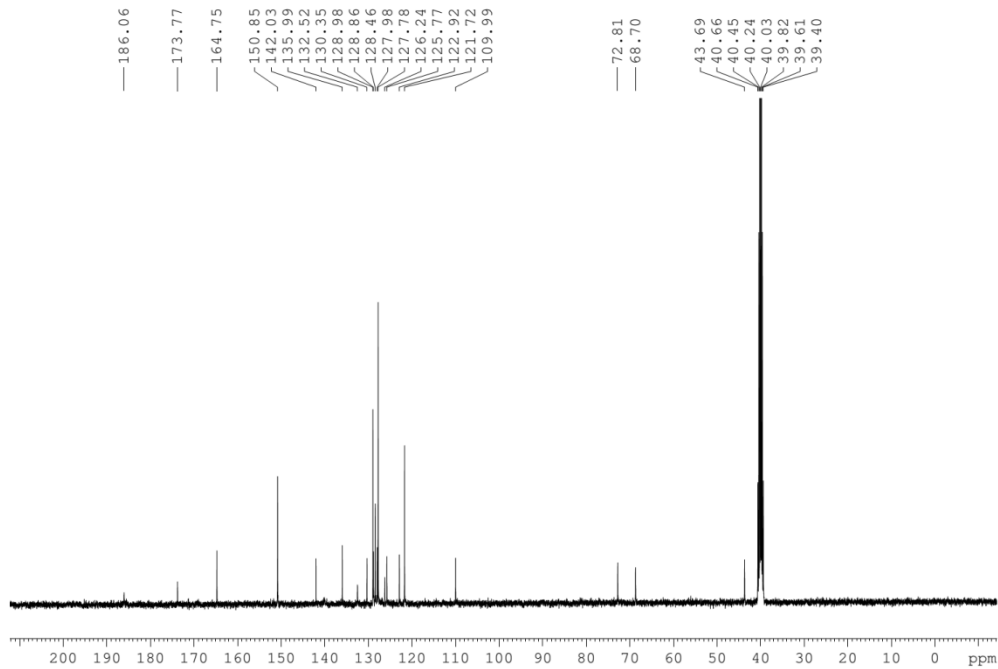

LB-V-P49-3

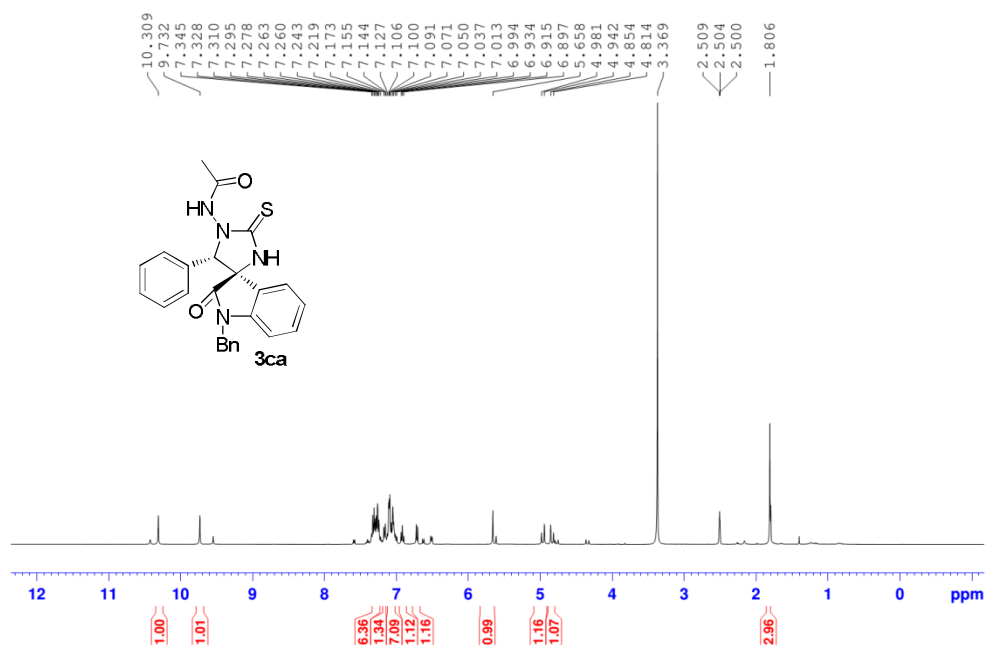

LB-V-P49-1

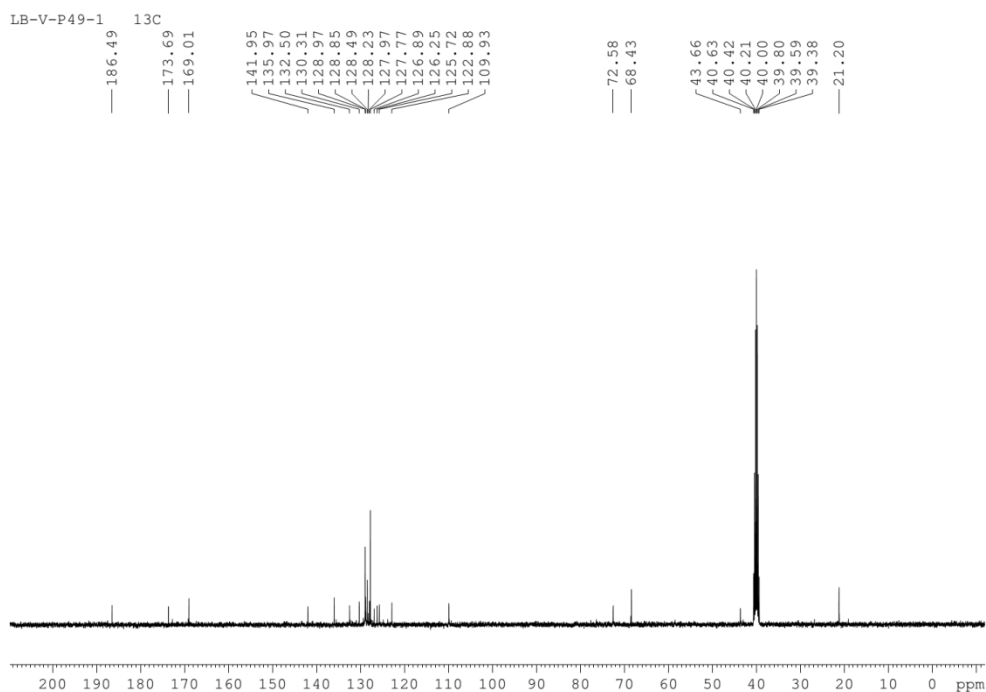



LB-V-P45-1

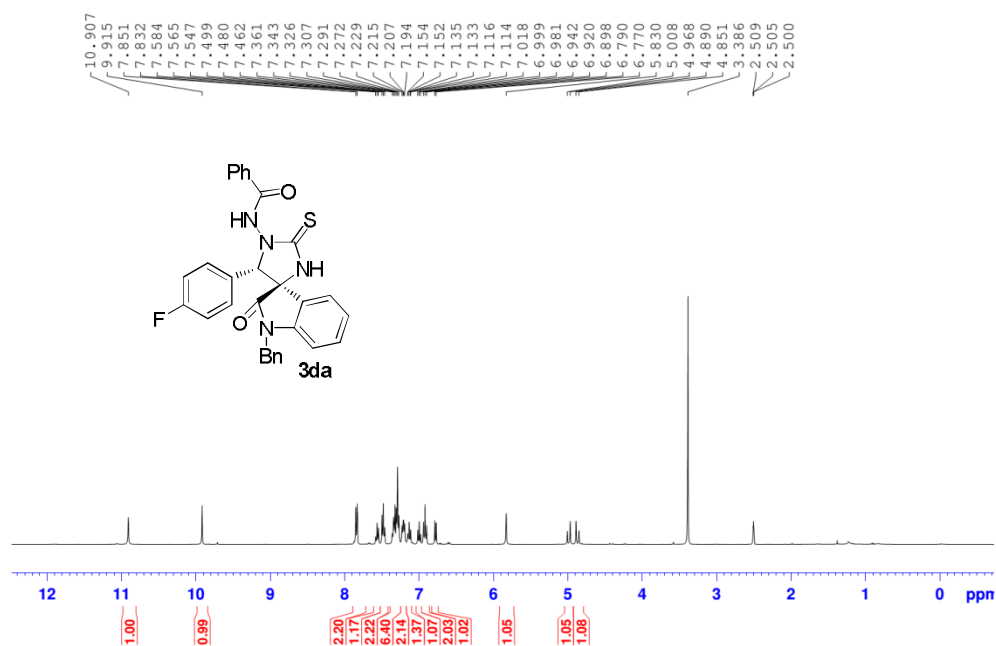

LB-V-P45-1 13C

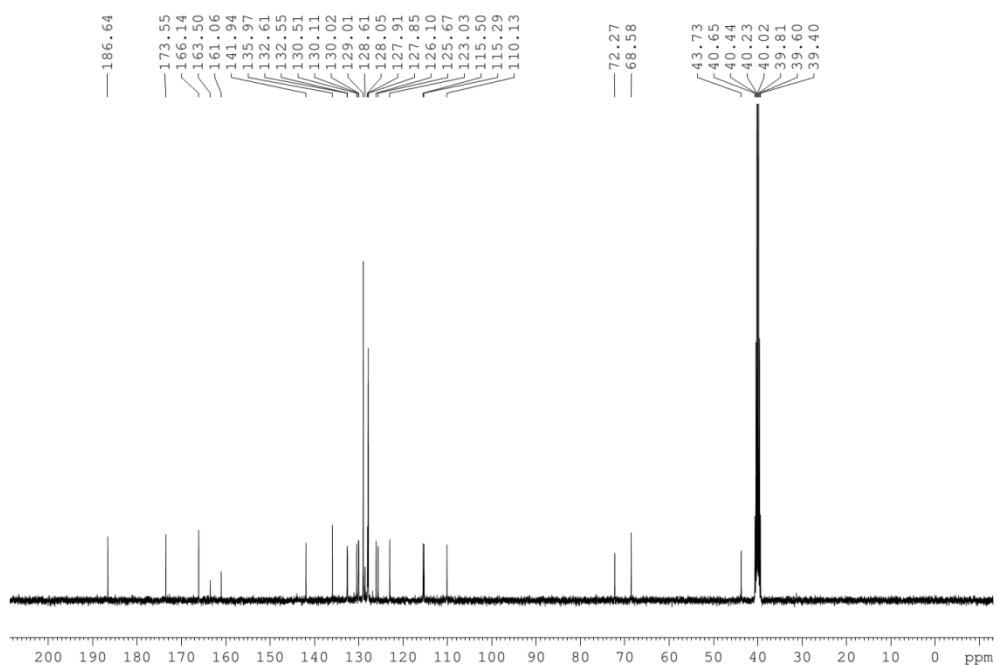

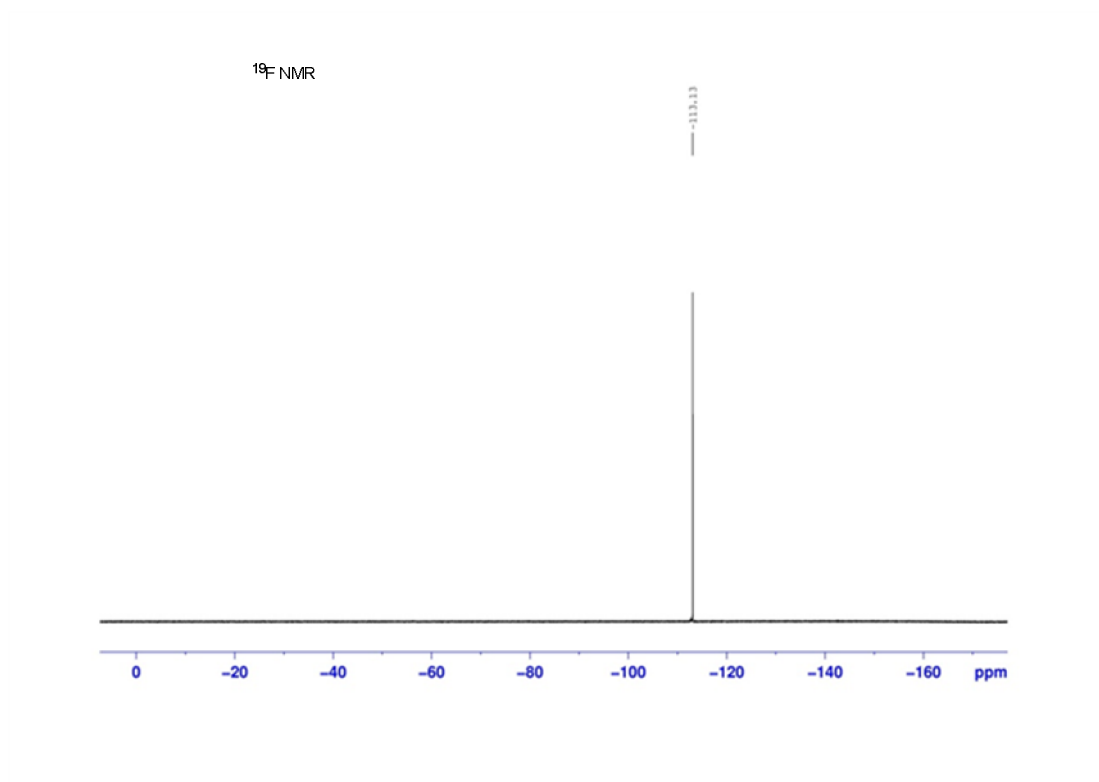

LB-V-P45-2

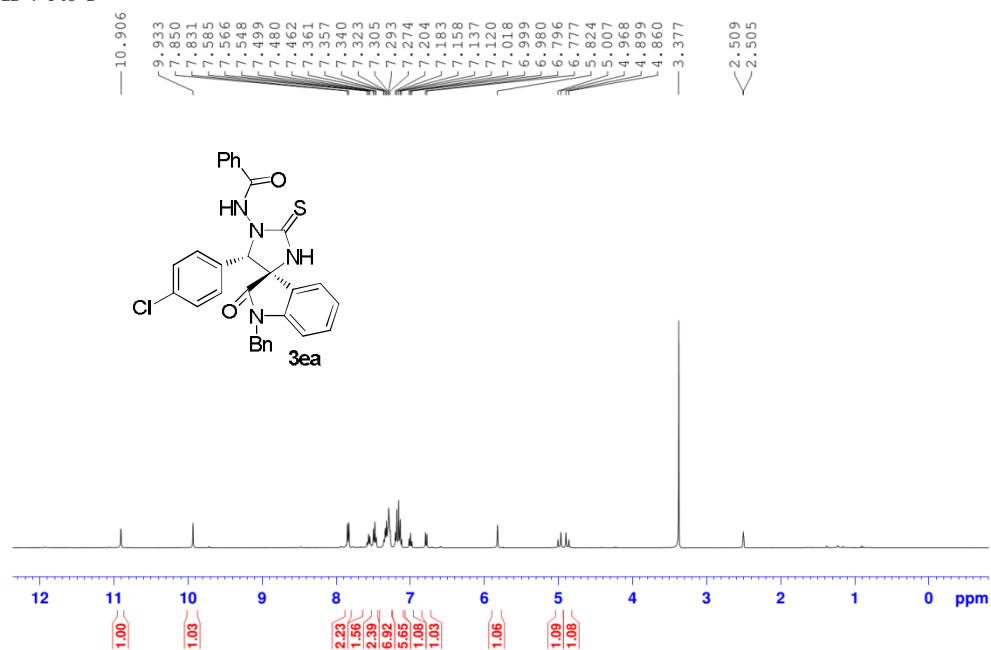

LB-V-P45-2 13C

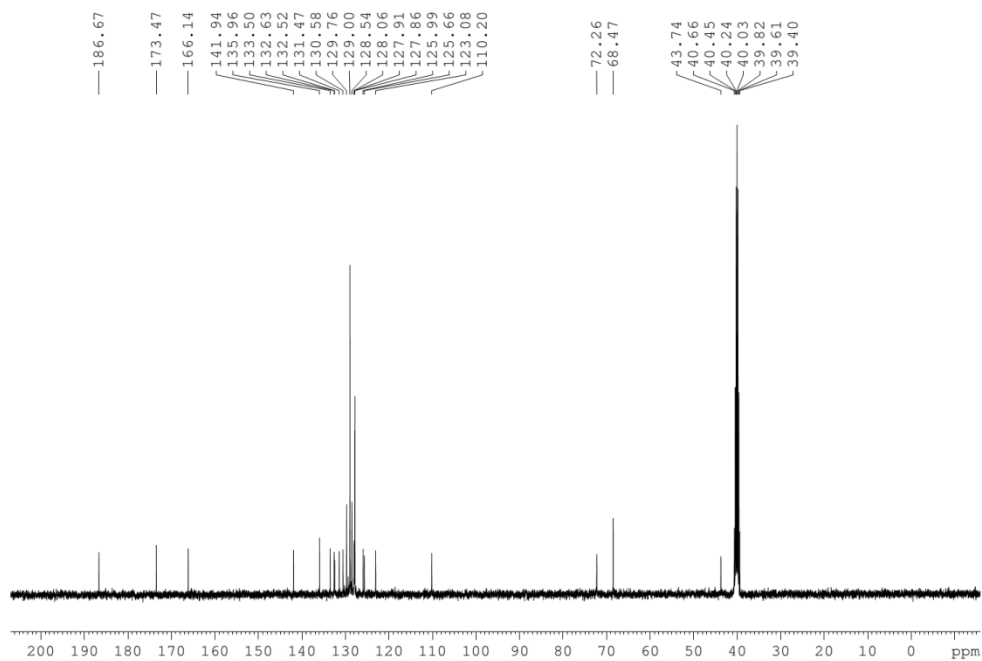

LB-V-P45-3

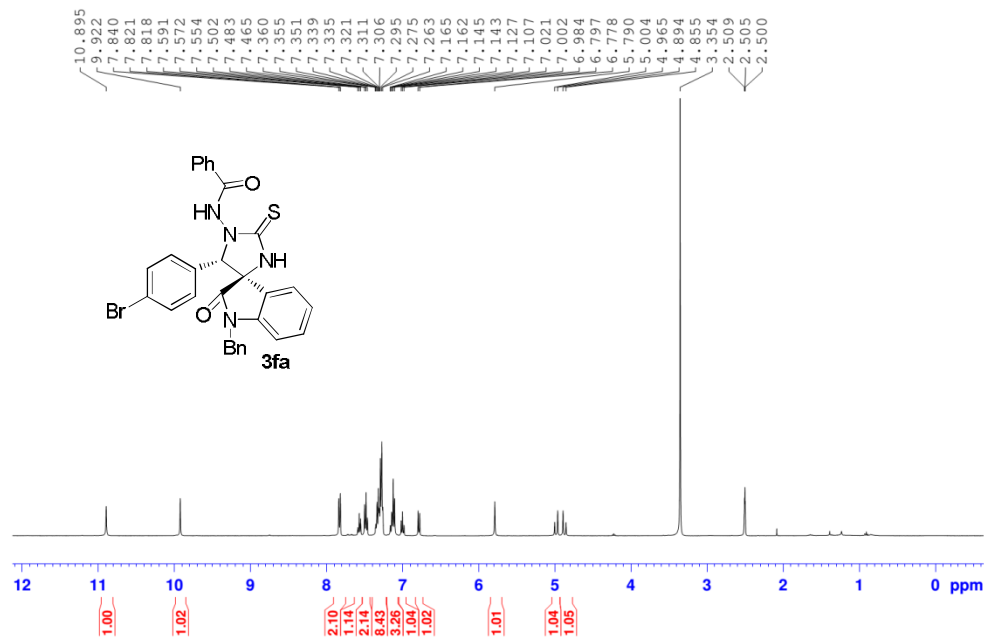

LB-V-P45-3 13C

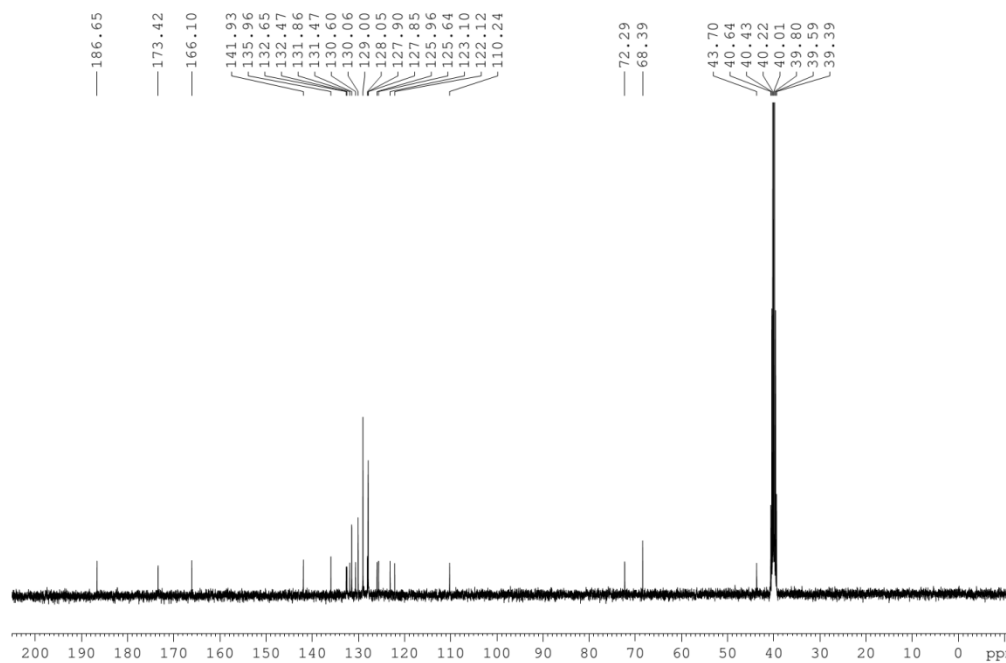

LB-V-P45-5

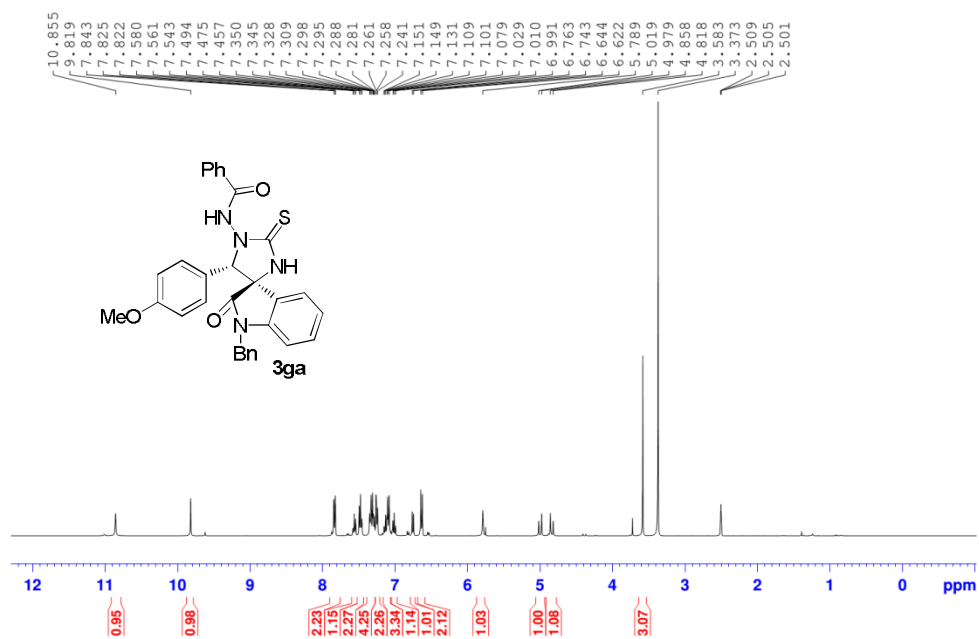

LB-V-P45-5

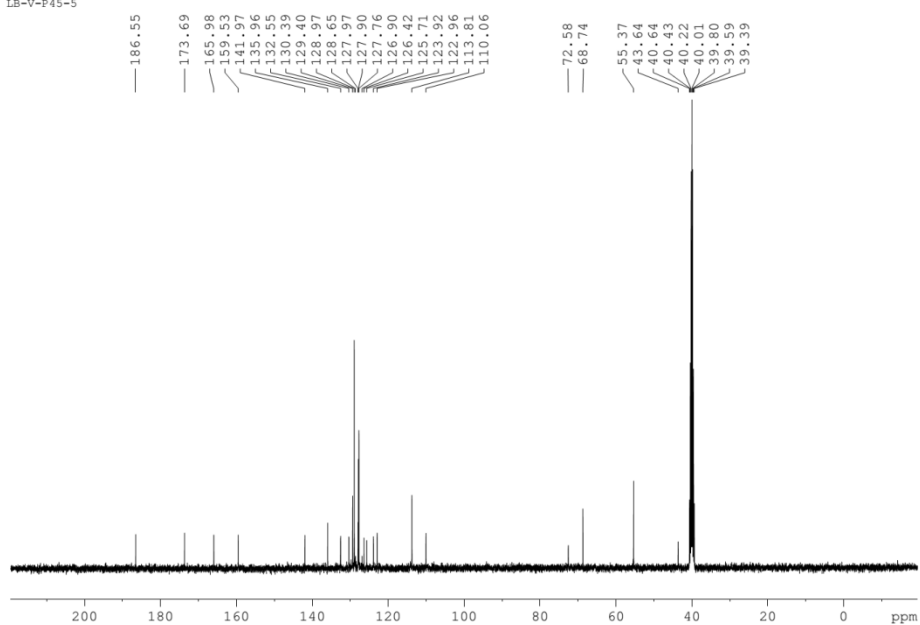

LB-V-P48-1

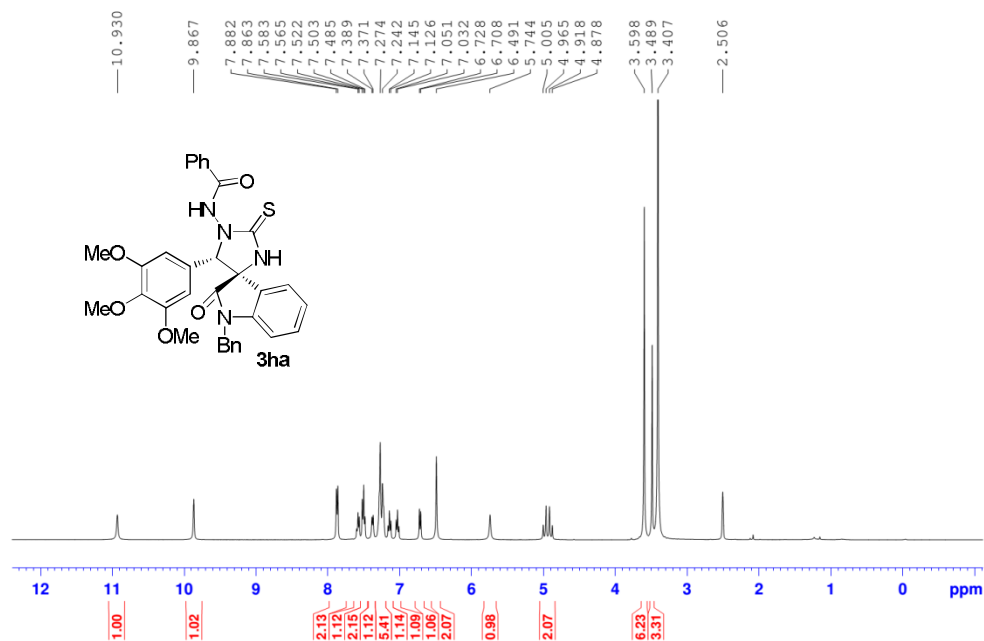

LB-V-P48-1 <sup>13</sup>C

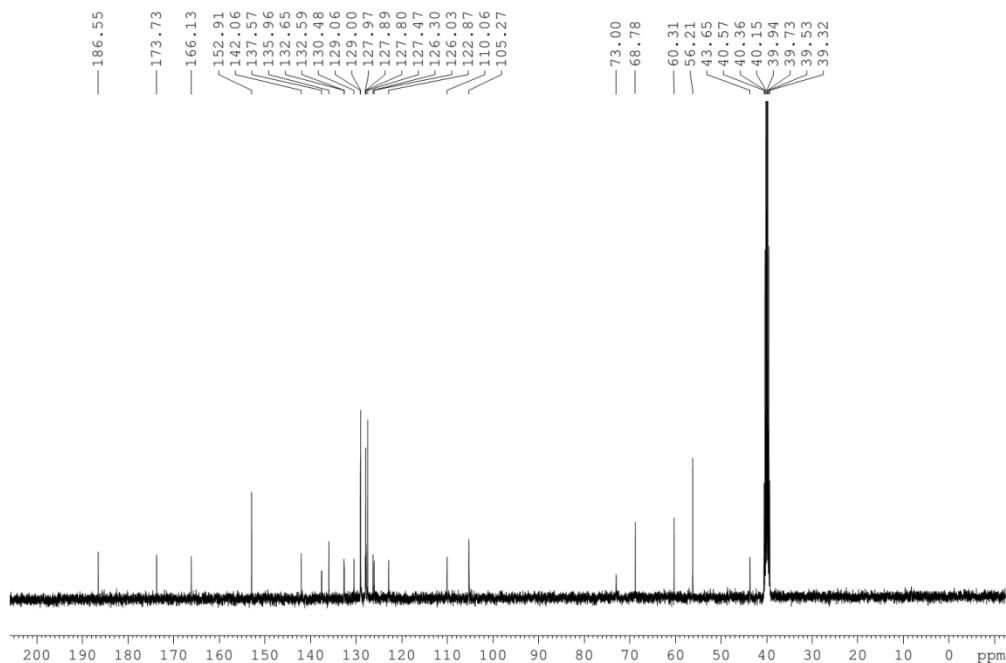

LB-V-P48-2

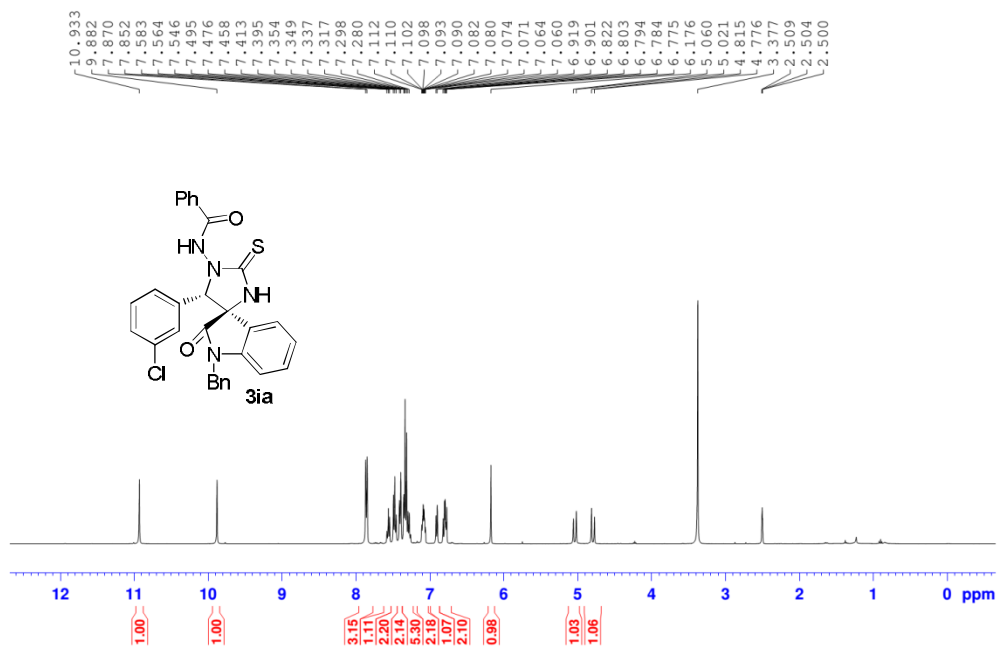

LB-V-P48-2 <sup>13</sup>C

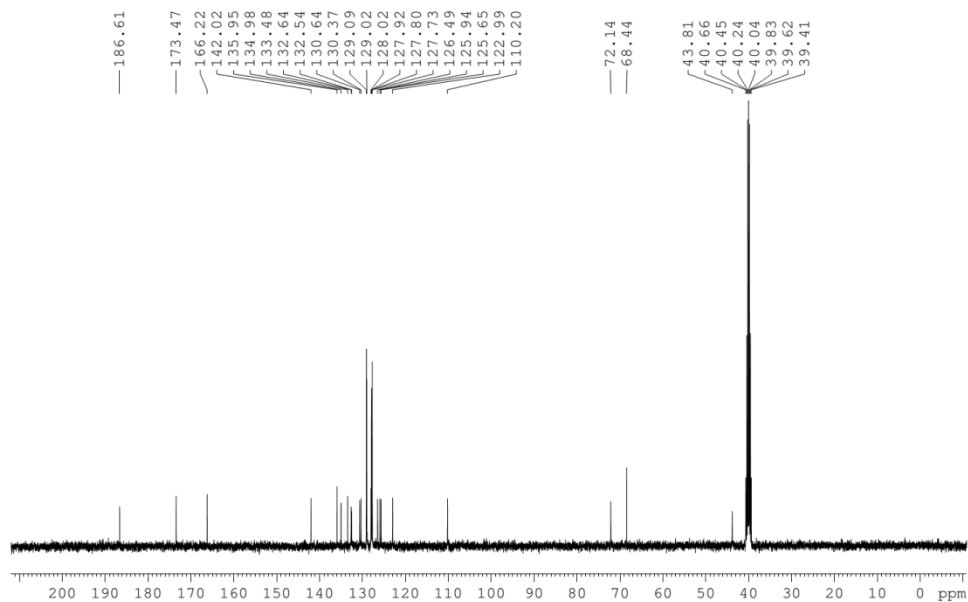

LB-V-P48-3

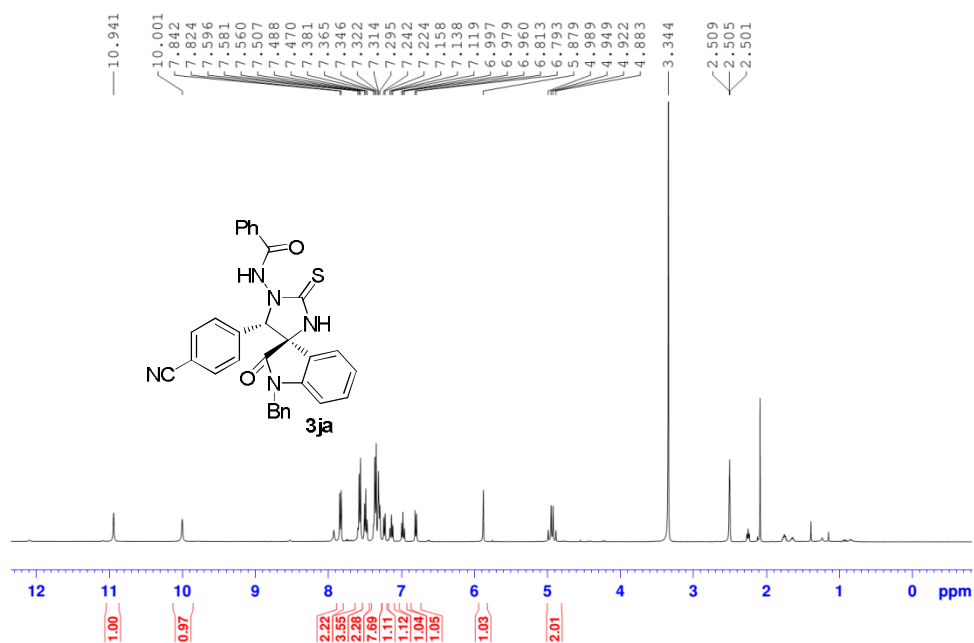

LB-V-P48-3

13C

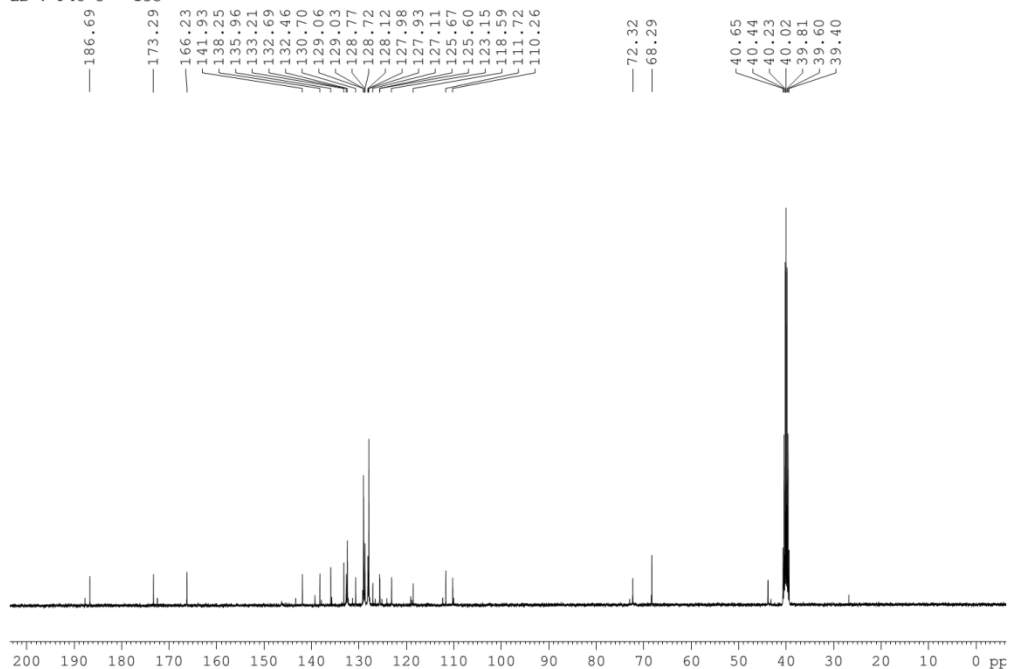



LB-V-P48-4

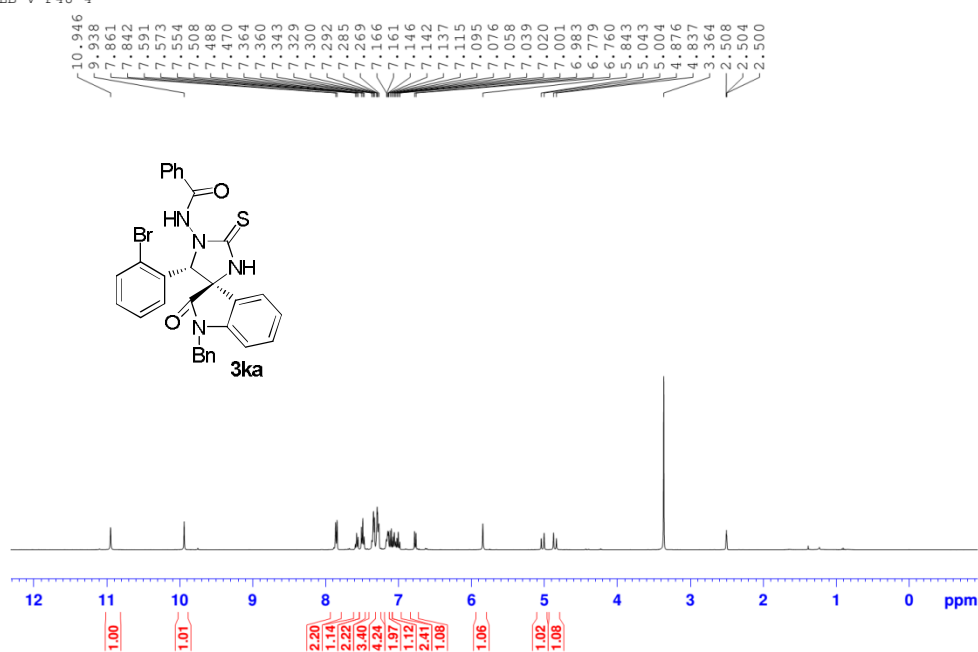

LB-V-P48-4 <sup>13</sup>C

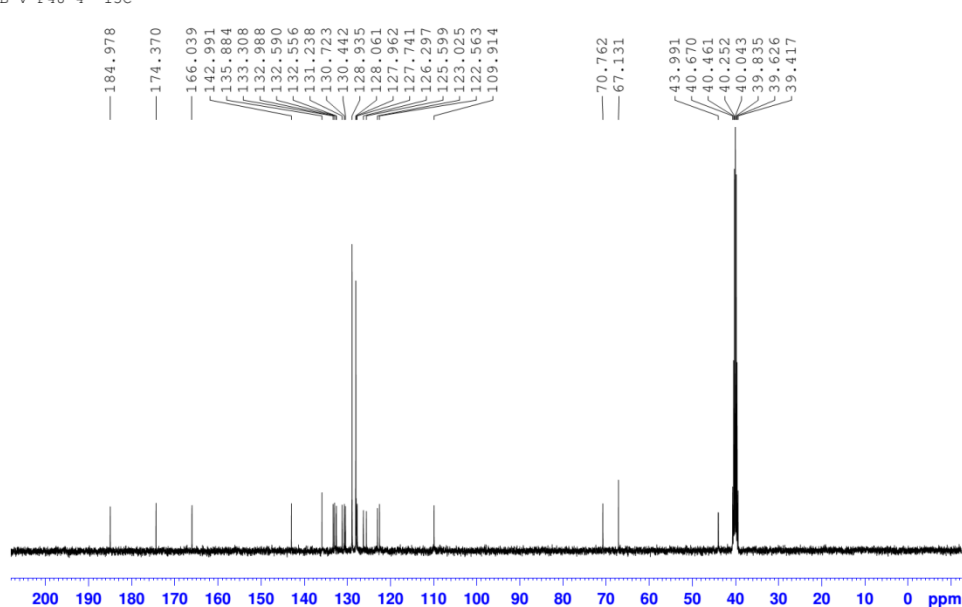

LB-V-P48-5

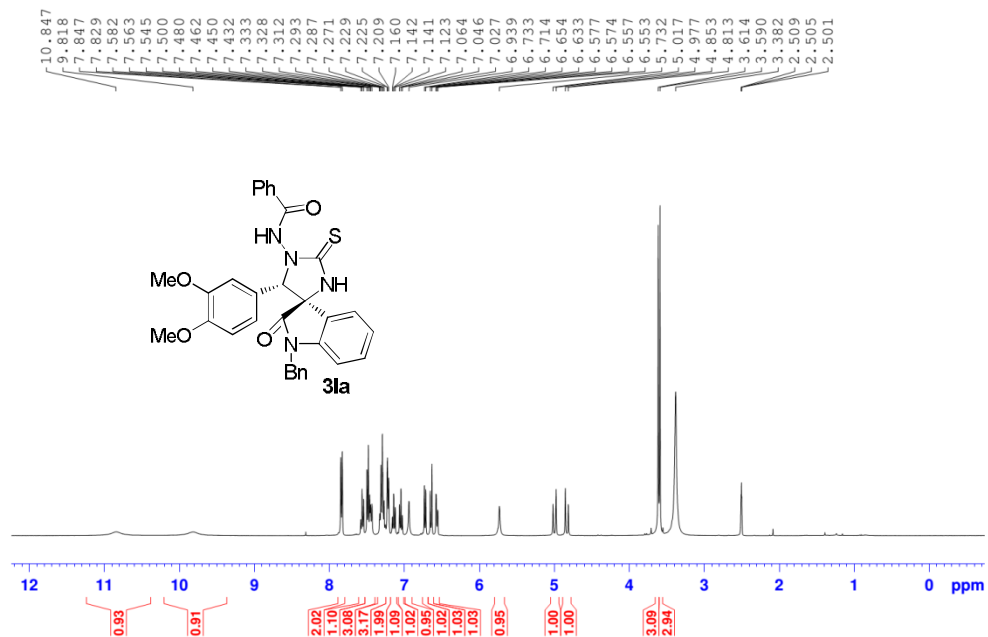

LB-V-P48-5 13C

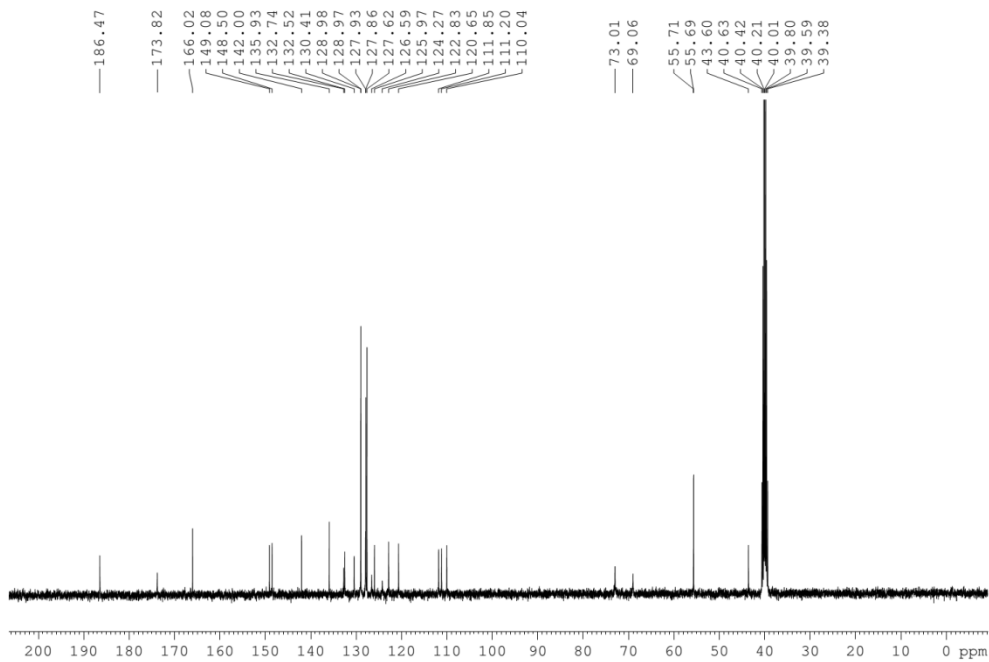

LB-V-P48-6

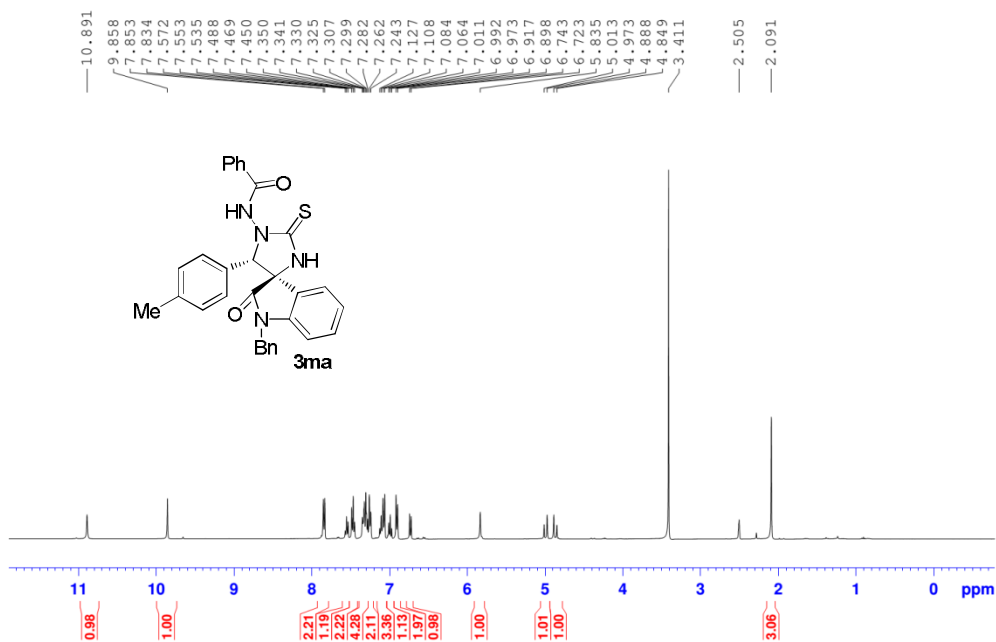

LB-V-P48-6

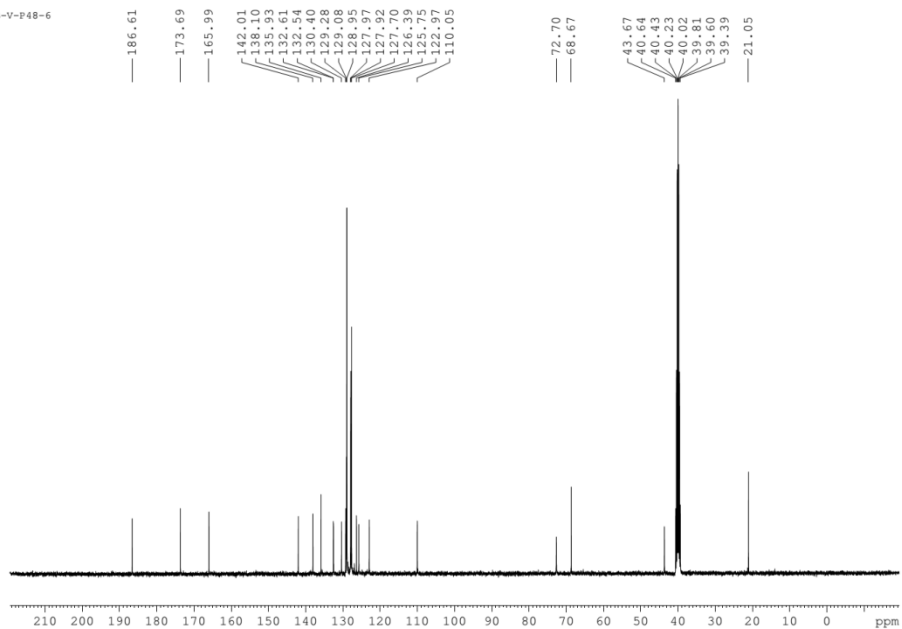

LB-V-P48-7

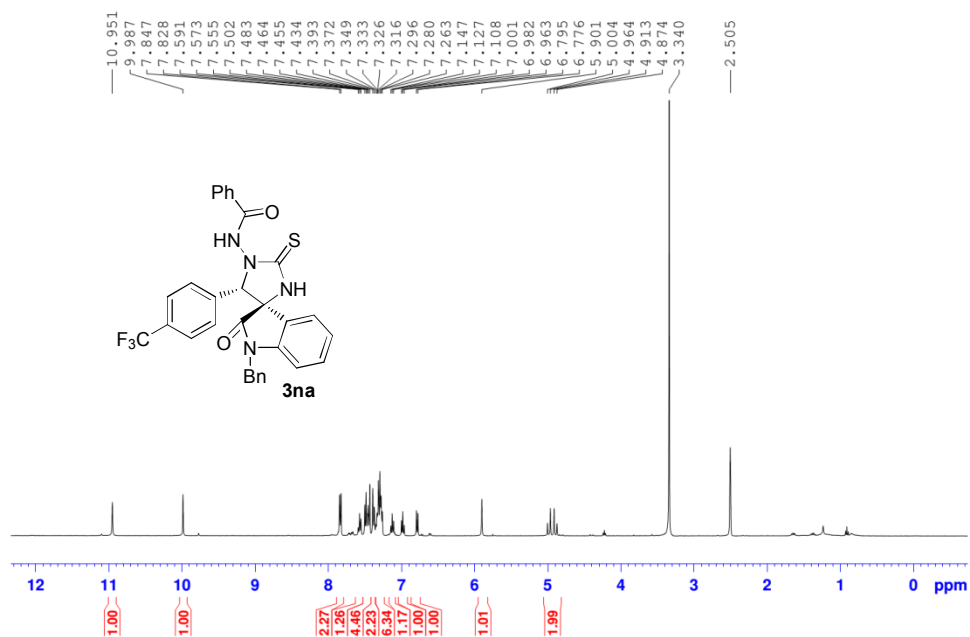

LB-V-P40-7 13c

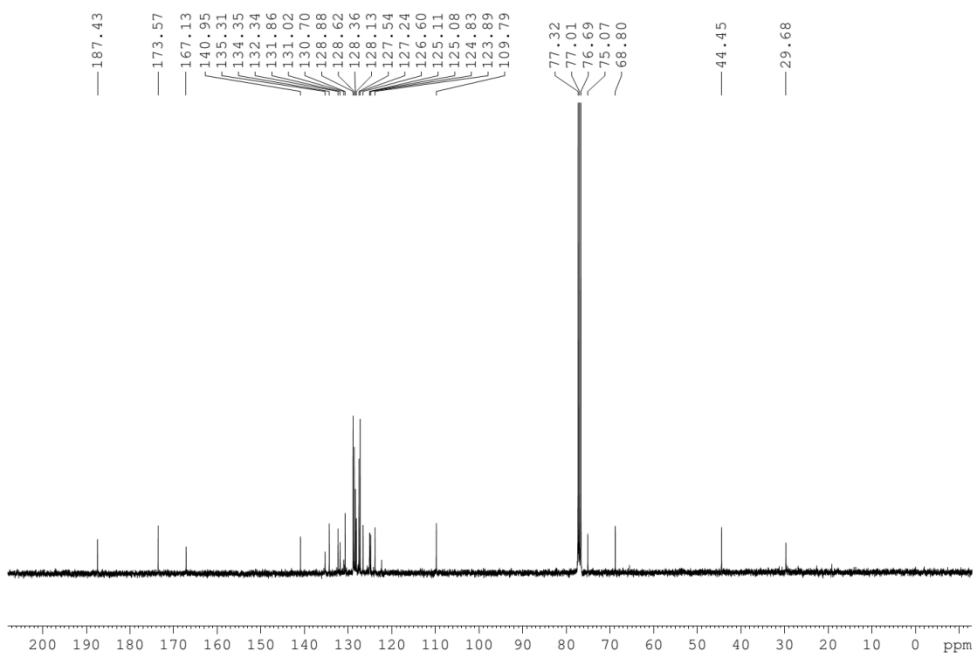

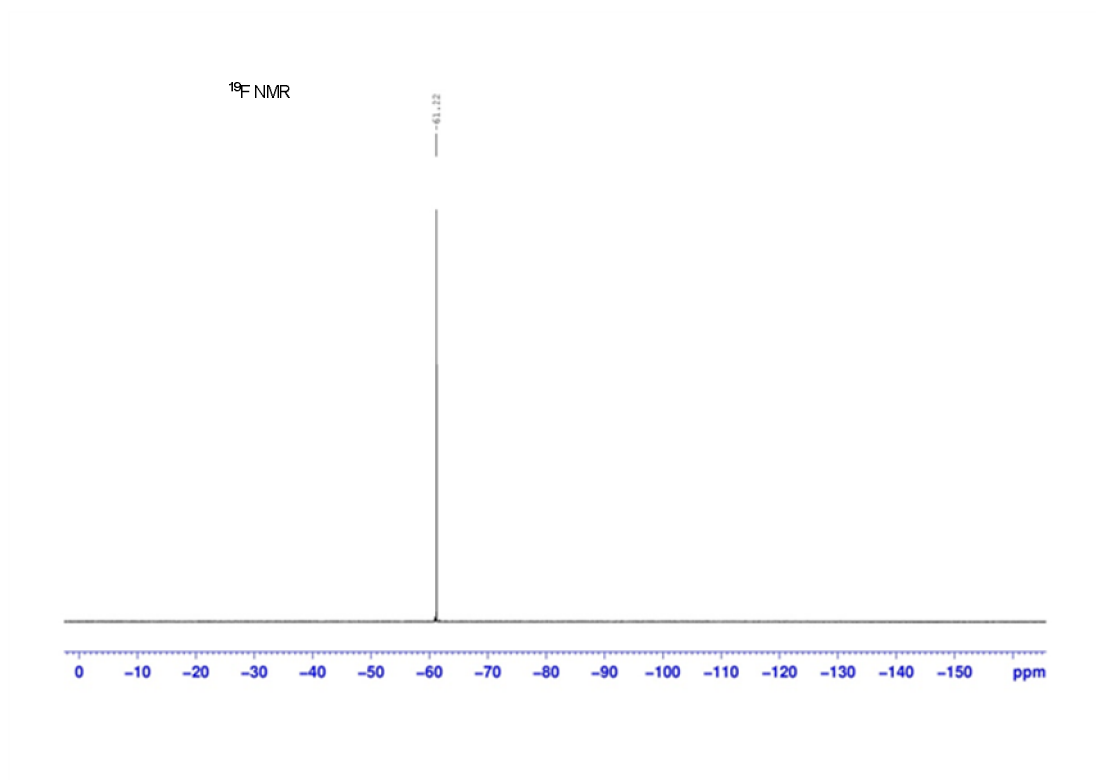

LB-V-P51-1

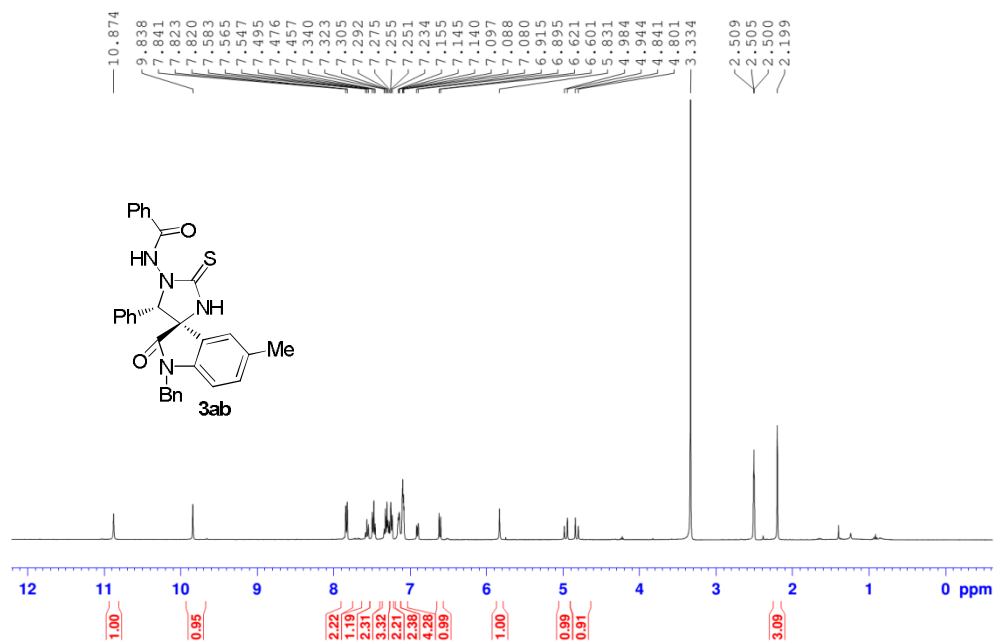

LB-V-P51-1 13C

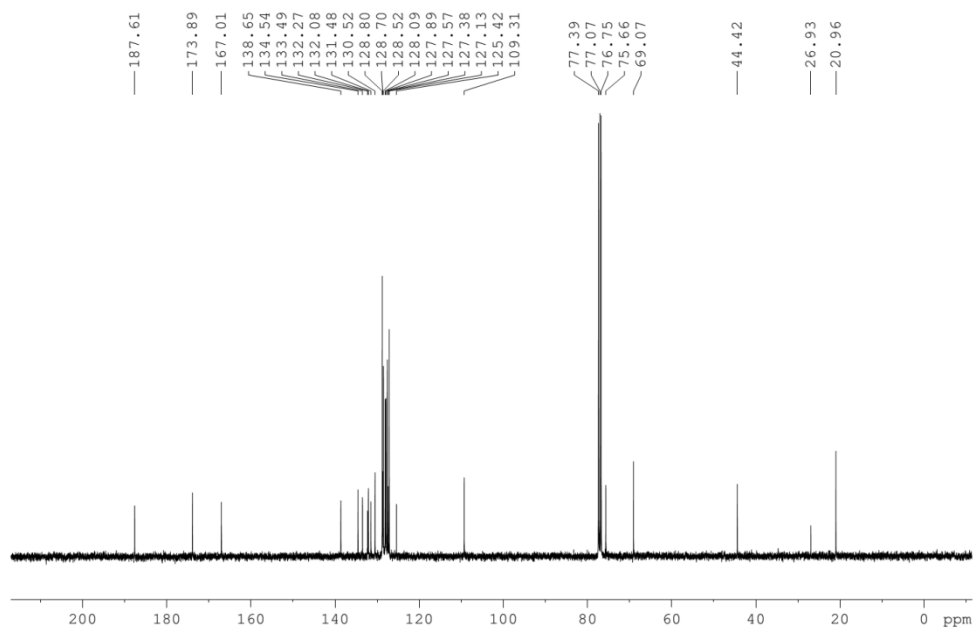

LB-V-P51-2

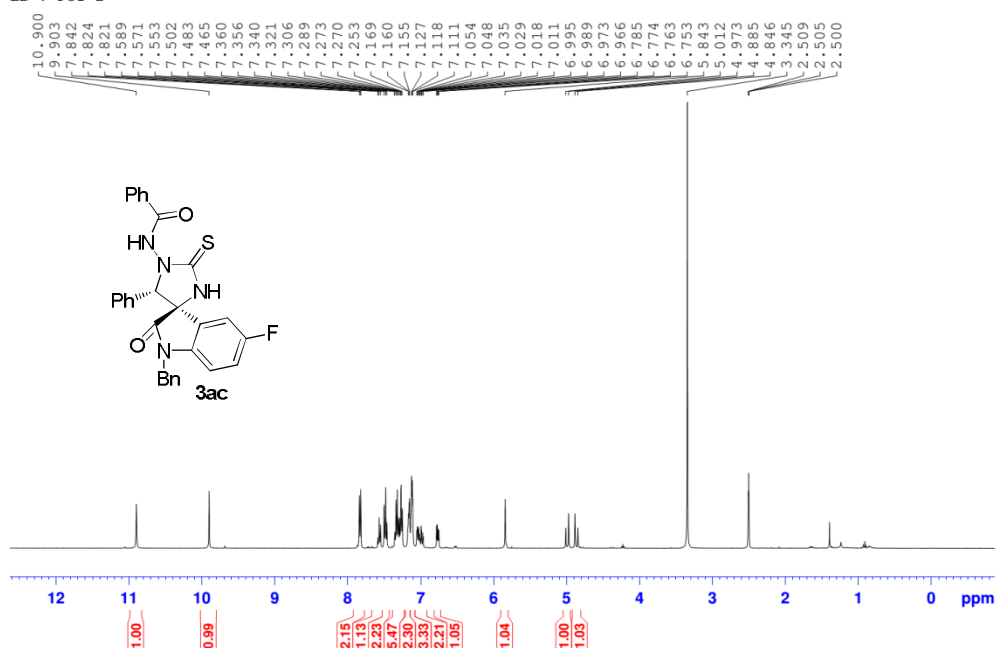

LB-V-P51-2 13C

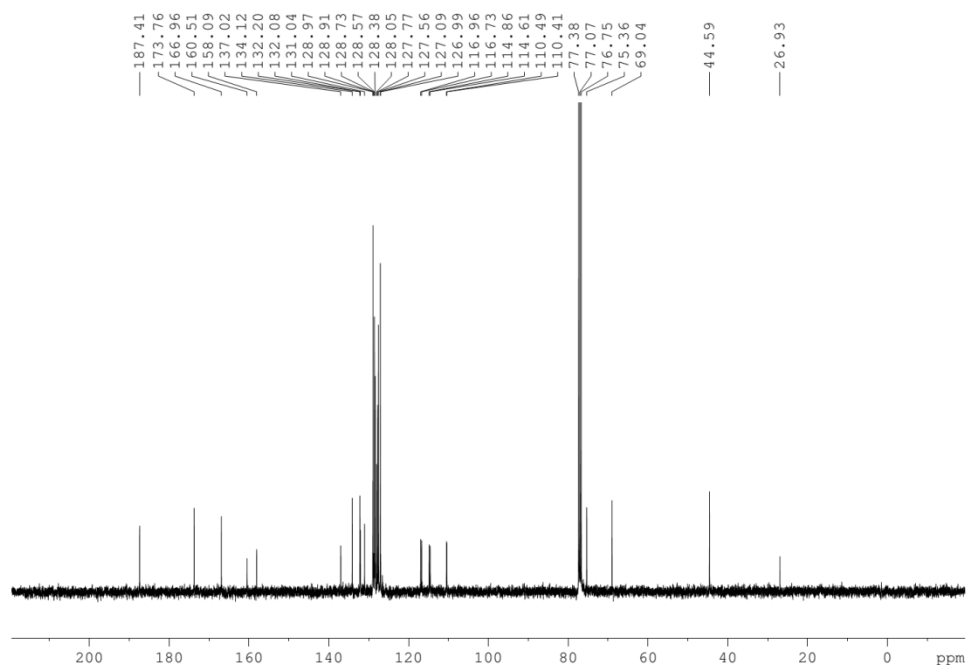

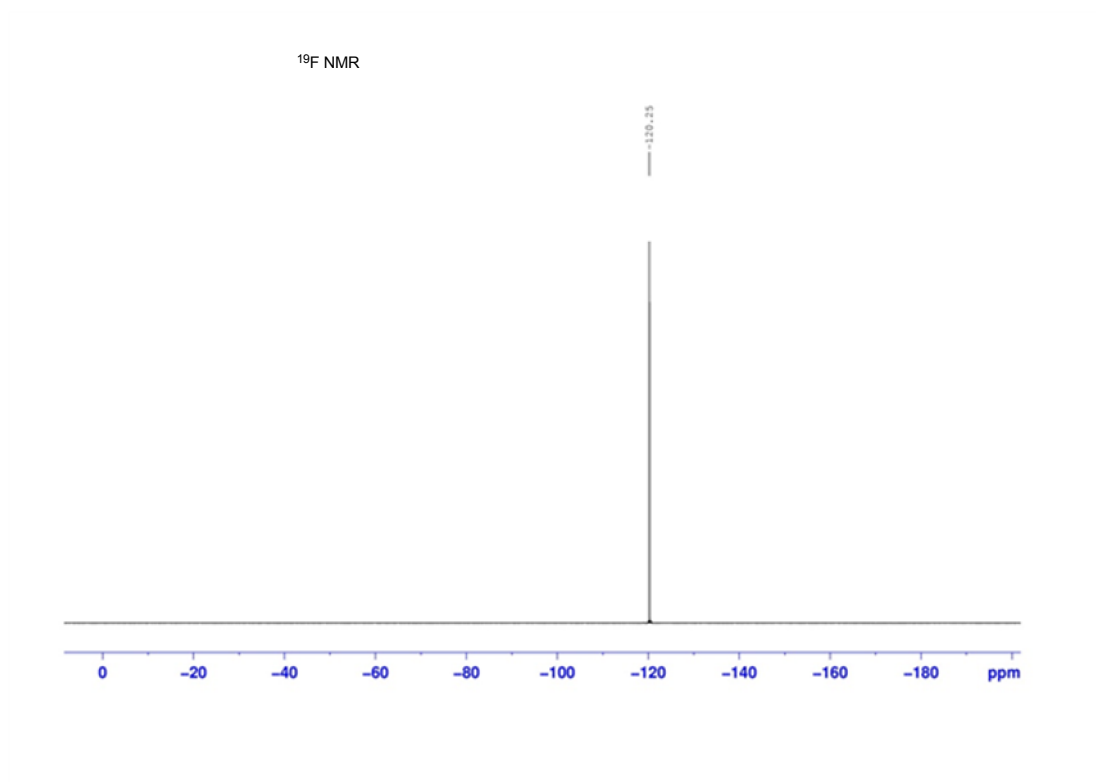



LB-V-P51-1

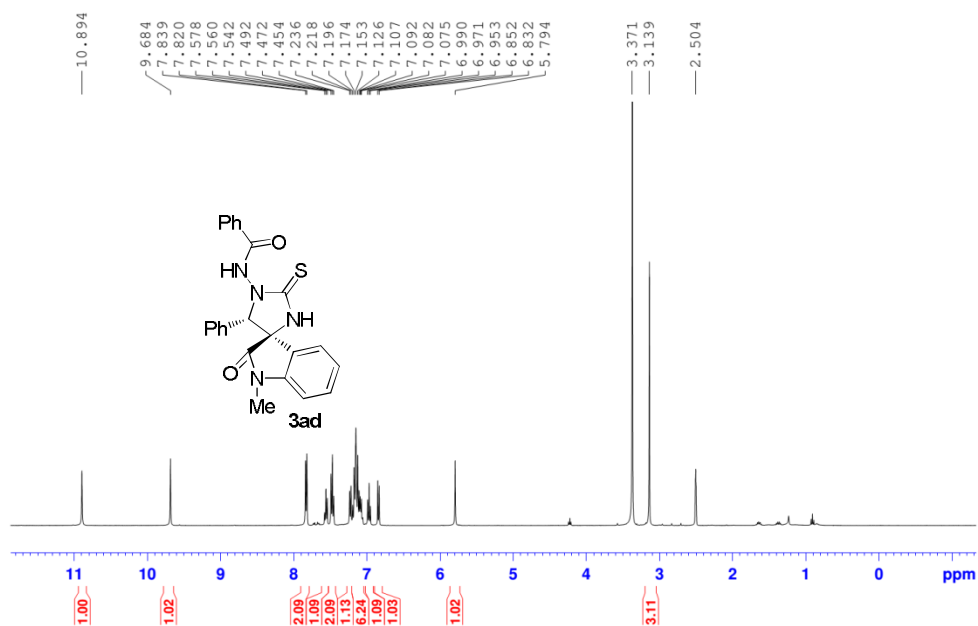

LB-V-P51-3 13C

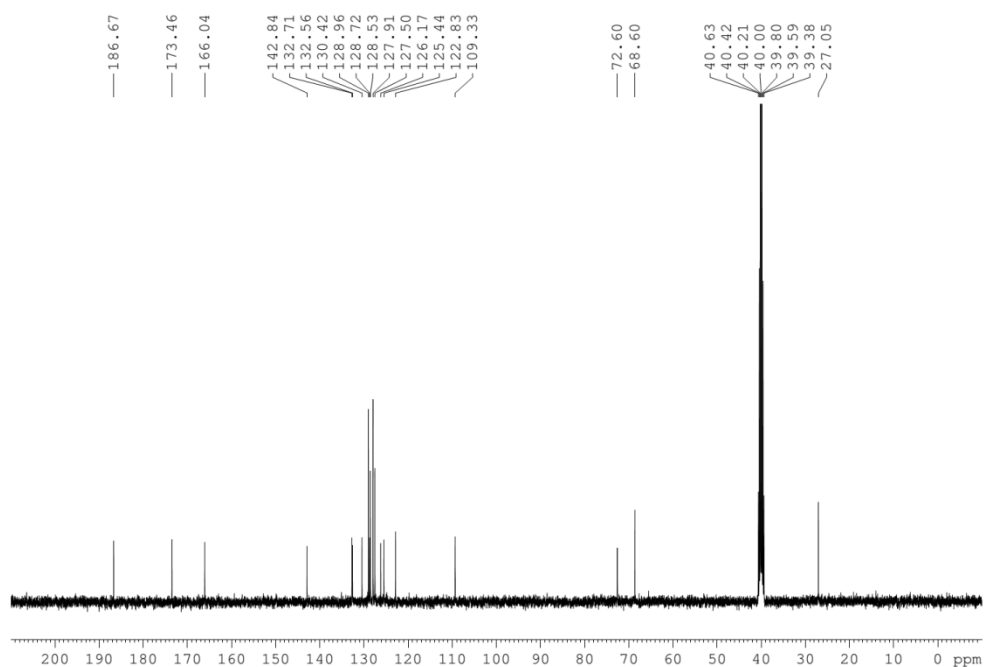

Supplement: c6ra01962e1.pdf [file c6ra01962e1.pdf]
